# Supplementary material for: Randomized clinical trial of the individualized coordination and empowerment for care partners of persons with dementia (ICECaP) intervention: impact on preparedness for caregiving
Source: Springer Nature journal article supplement (doi:10.1007/s40520-025-02959-z), 2025-03-01

## CONSORT 2010 Flow Diagram

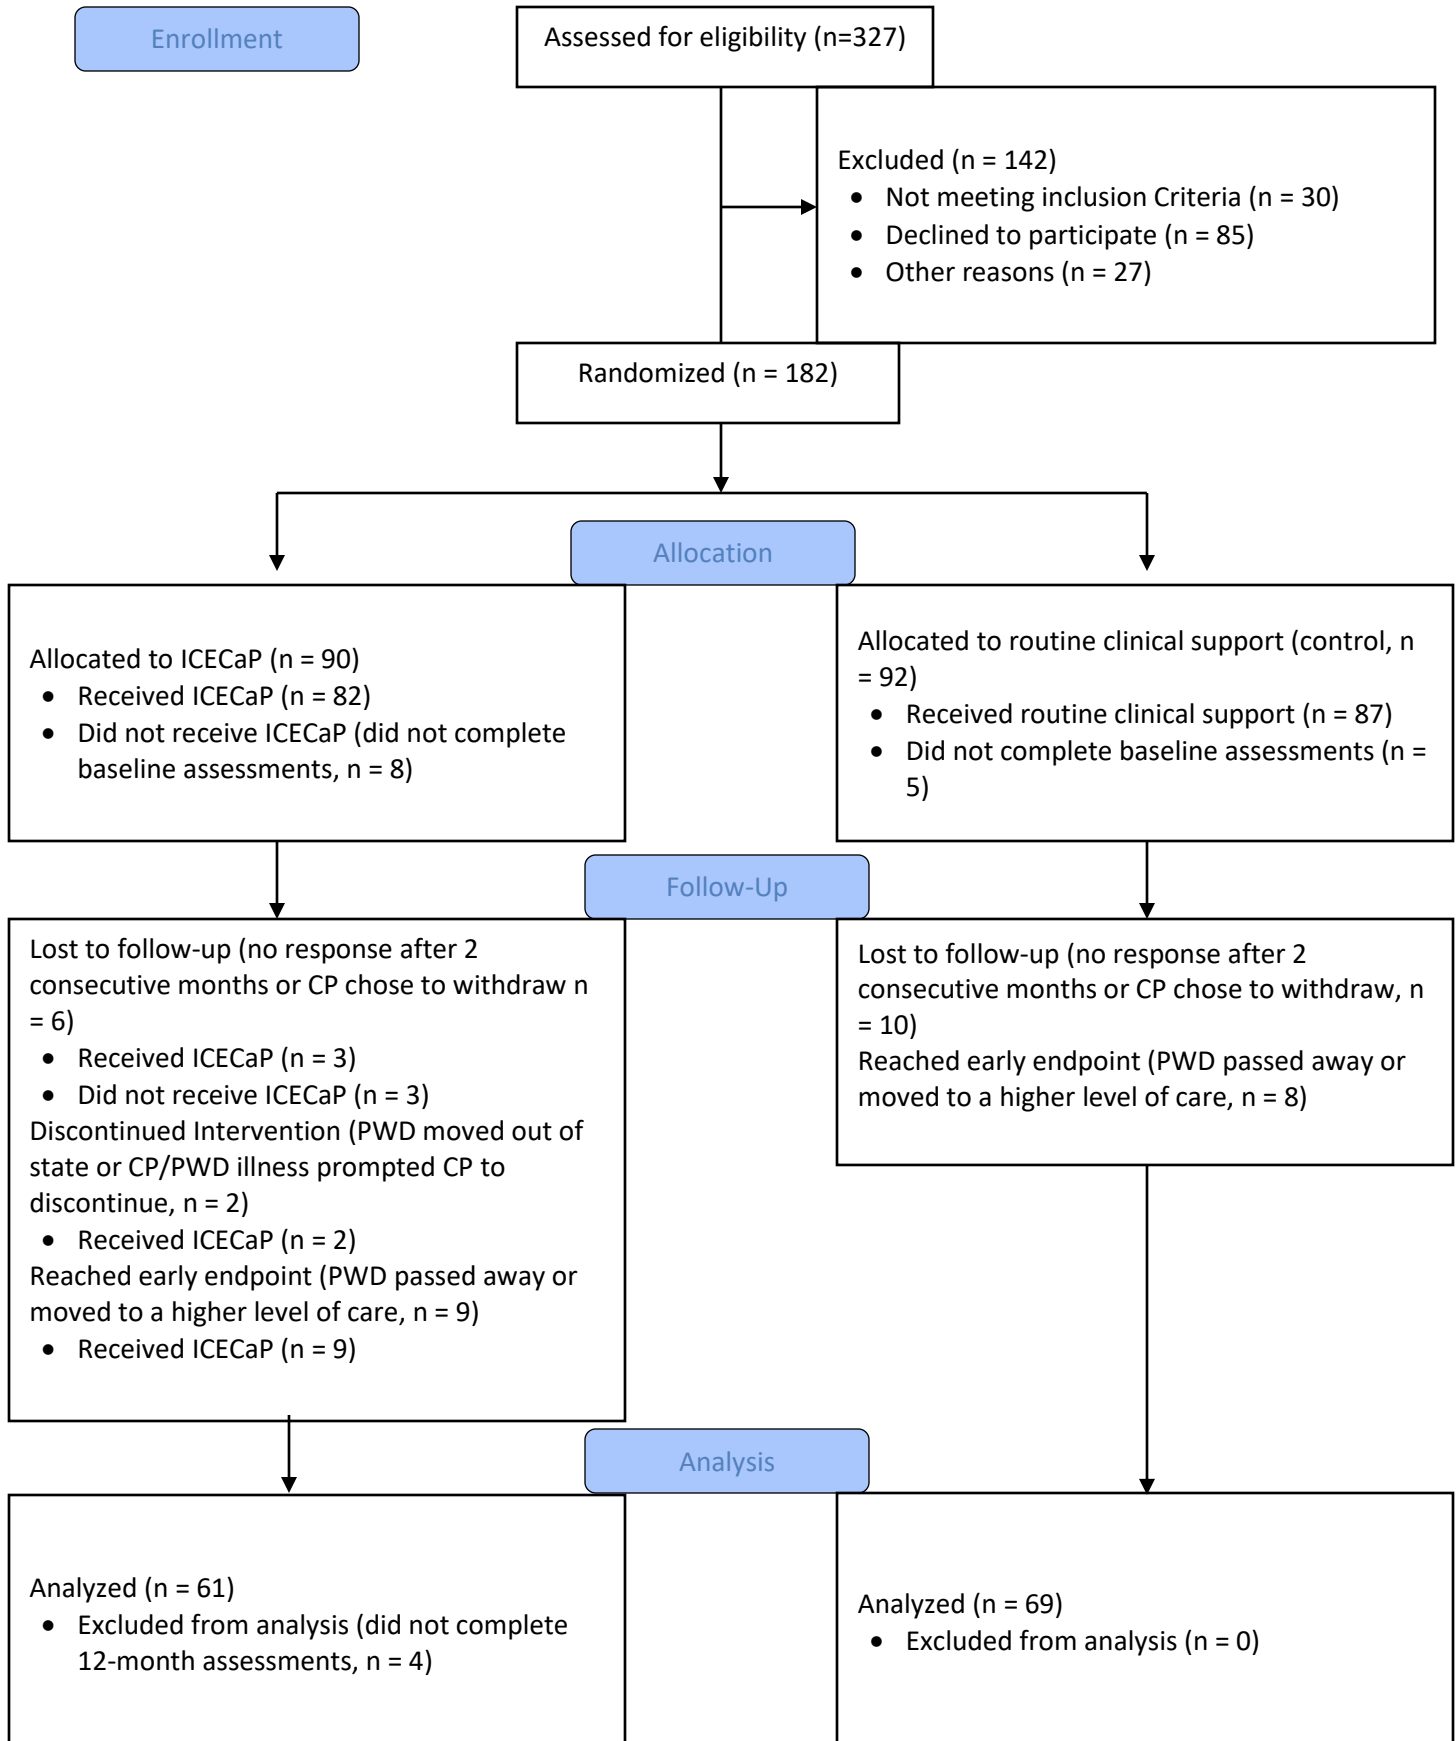

Supplement: MOESM2 [file 40520_2025_2959_MOESM2_ESM.pdf]
